# Supplementary material for: Assembling CoSn3 nanoparticles on multiwalled carbon nanotubes with enhanced lithium storage properties
Source: Royal Society of Chemistry journal article supplement (doi:10.1039/c0nr01008a), 2011-01-01
Supplement: c0nr01008a.pdf [file c0nr01008a.pdf]

## Assembling $\text{CoSn}_3$ Nanoparticles on Multiwalled Carbon Nanotubes with Enhanced Lithium Storage Properties

Chuanxin Zhai, Ning Du, Hui Zhang, Jingxue Yu, Ping Wu, Chengmao Xiao and Deren Yang\*

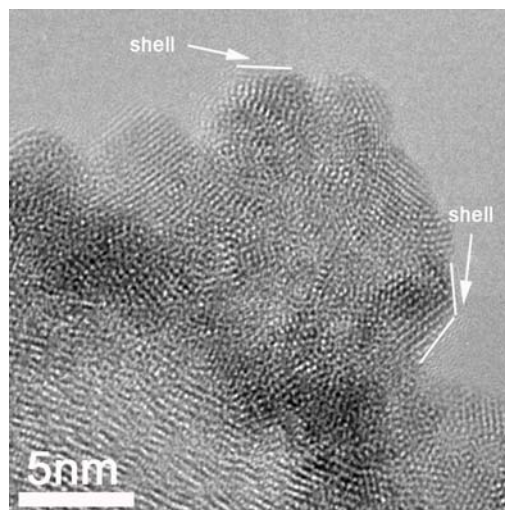

Fig. S1 Magnified HRTEM image of  $\text{CoSn}_3$ -MWCNTs nanohybrids.
